# Supplementary material
Source: MDPI journal article supplement (https://www.mdpi.com/2073-4395/11/11/2283)
Supplement: s1 [file s1]

# Supplementary Materials

**Table S1.** Details of durum wheat, barley and lentil genotypes evaluated during seasons 2018-2019 and 2019-2020.

| Entry                        | Entry GID | Pedigree                                                                     | CWR                   | HP rate of CWR genomic contribution |
|------------------------------|-----------|------------------------------------------------------------------------------|-----------------------|-------------------------------------|
| <b>Durum wheat germplasm</b> |           |                                                                              |                       |                                     |
| Karim                        | 800017792 | Jori/Anhinga//Flamingo (Check)                                               | none                  | 0.00%                               |
| Zagharin2                    | 800043194 | Icasyr1/3/Gcn//Stj/Mrb3 (Check)                                              | none                  | 0.00%                               |
| Bonidur                      | 800029382 | IRIDE/LINEA-PSB-0114 (Check)                                                 | none                  | 0.00%                               |
| Chicca                       | 800018562 | CandocrossH25/3/Mrf2/NormalHamari//Bcr/Lk s4/4/Berghouata1 (Check)           | none                  | 0.00%                               |
| Kundermiki                   | 600076816 | MorlF38//Bcrch1/Kund1149/3/Bicredera1/Miki (Check)                           | none                  | 0.00%                               |
| Faraj                        | 800028288 | T.ararticum/3/Arthur71/Lahn//Blk2/Lahn/4/Quarmal                             | <i>T. araraticum</i>  | 25.00%                              |
| Nachit                       | 800043267 | Amedakul1/TdicoSyrCol//Loukos                                                | <i>T. dicoccoides</i> | 25.00%                              |
| Jabal                        | 800018569 | Korifla/AegSpeltoidesSyr//Mrb5                                               | <i>Ae. speltoides</i> | 25.00%                              |
| Icamoram7                    | 600100438 | ICAMORT. Araraticum0472/Ammar7                                               | <i>T. araraticum</i>  | 12.50%                              |
| Icaqinzen                    | 800018534 | IcamorT.araraticum0472//Quarmal/Gbch2/3/Mgnl3/Ainzen1                        | <i>T. araraticum</i>  | 6.25%                               |
| Icaverse                     | 600108182 | Azeghar1/4/IcamorT.araraticum0462/3/Maamouri3//Vitron/Bidra1/5/Mgnl3/Ainzen1 | <i>T. araraticum</i>  | 3.12%                               |
| Maghrour                     | 800032178 | Amedakul1/TdicoSyrCol//Cham1                                                 | <i>T. dicoccoides</i> | 25.00%                              |
| Sahi                         | 800018532 | Icasyr1/3/Bcr/Sbl5//T.urartu/4/13376/Bcrch1//Ossl1/Stj5                      | <i>T. urartu</i>      | 12.50%                              |

|                         |           |                                                                                                  |                                               |        |
|-------------------------|-----------|--------------------------------------------------------------------------------------------------|-----------------------------------------------|--------|
| Zeina                   | 273403    | IcamorT.araraticum0471//IcamorT.araraticum0459/Ammar8 /4/Stj3//Dra2/Bcr/3/Ter3                   | T.<br><i>araraticum</i>                       | 12.50% |
| Syryopis                | 800018541 | Marsyr3/3/Gcn//Stj/Mrb3/4/T.Aeg.Crosses                                                          | T.<br><i>aegilopiodes</i>                     | 25.00% |
| ADYTM18-099             | 800034117 | Amedakul1/TdicoSyrCol//Cham1/3/Korifla/Ae gSpeltoidesSyr//Amedakul                               | T.<br><i>dicoccoides &amp; Ae. speltoides</i> | 12.50% |
| DAWRyt123               | 800034692 | Mrb5/TdicoAlpCol//Cham1                                                                          | T.<br><i>dicoccoides</i>                      | 25.00% |
| IDON39-13               | 800031875 | IcamorT.araraticum0462/4/Gdr2//SwAlg/Gdr143/3/IcamorT. araraticum0463/5/Ter1//Mrf1/Stj2          | T.<br><i>araraticum</i>                       | 12.50% |
| IDON39-18               | 800031458 | IcamorT.araraticum041/4/IcamorT.araraticum0469/3/Bcr/Gro1//Mgn1/5/MIKI2                          | T.<br><i>araraticum</i>                       | 12.50% |
| IDON39-27               | 800018565 | Quabrach1/4/IcamorT.araraticum0462/3/Maamouri3//Vitron/Bidra1/5/Murlagost2                       | T.<br><i>araraticum</i>                       | 3.12%  |
| IDON39-29               | 800034676 | Azeghar2/5/IcamorT.araraticum0462/4/Stj3//Bcr /Lks4/3/Icamor"s"/6/Stj3//Bcr/Lks4/3/Ter3          | T.<br><i>araraticum</i>                       | 6.25%  |
| IDON39-54               | 800031879 | Korifla/AegSpeltoidesSyr//Amedakul                                                               | Ae.<br><i>speltoides</i>                      | 25.00% |
| IDON39-70               | 800031880 | CandocrossH25/Bicredera1/3/ICAMORT.araraticum0463//Lah/Ch12504/4/Bcrch1//Ossl1/Stj5/5 /Ysf1/Otb6 | T.<br><i>araraticum</i>                       | 1.56%  |
| IDON39-96               | 800031881 | Maamouri1/5/IcamorT.araraticum0462/4/Stj3//B cr/Lks4/3/Icamors/6/Mgnl3/Ainzen1                   | T.<br><i>araraticum</i>                       | 3.12%  |
| <b>Barley germplasm</b> |           |                                                                                                  |                                               |        |
| Rihane03                | 28901     | Check (6 rows)                                                                                   | H.<br><i>vulgare L.</i>                       | 0.00%  |
| WI2291                  | 28900     | Check (2 rows)                                                                                   | H.<br><i>vulgare L.</i>                       | 0.00%  |
| Furat-3                 | 28902     | Check (2 rows)                                                                                   | H.<br><i>vulgare L.</i>                       | 0.00%  |
| Tamellalt               | 28903     | Check (2 rows)                                                                                   | H.<br><i>vulgare L.</i>                       | 0.00%  |

|    |       |                                                                                                                  |                      |        |
|----|-------|------------------------------------------------------------------------------------------------------------------|----------------------|--------|
| 11 | 28897 | ChiCm/An57//Albert/3/Alger/Ceres.362-1-1/4/Arta/5/Moroc9-75//WI2291/CI01387/3/H.spont.41-1                       | <i>H. spontaneum</i> | 25.00% |
| 2  | 28895 | ChiCm/An57//Albert/3/Alger/Ceres.362-1-1/4/Arta/5/Moroc9-75//WI2291/CI01387/3/H.spont.41-1                       | <i>H. spontaneum</i> | 25.00% |
| 18 | 28899 | ChiCm/An57//Albert/3/Alger/Ceres.362-1-1/4/Arta/5/Moroc9-75//WI2291/CI01387/3/H.spont.41-1                       | <i>H. spontaneum</i> | 25.00% |
| 19 | 5935  | ChiCm/An57//Albert/3/Alger/Ceres.362-1-1/4/Arta/5/Moroc9-75//WI2291/CI01387/3/H.spont.41-1                       | <i>H. spontaneum</i> | 25.00% |
| 7  | 5864  | Moroc9-75//WI2291/CI01387/3/H.spont.41-1/4/Arta/3/Arar/H.spont.19-15//Hml                                        | <i>H. spontaneum</i> | 12.50% |
| 1  | 5873  | SLB15-05/4/H.spont.96-3/3/Roho//Alger/Ceres362-1-1/5/Roho/4/Zanbaka/3/ER/Apm//Lignee131                          | <i>H. spontaneum</i> | 12.50% |
| 4  | 28896 | Soufara-02/3/RM1508/Por//WI2269/4/Hml-02/ArabiAbiad//ER/Apm/5/SLB15-05/4/H.spont.96-3/3/Roho//Alger/Ceres362-1-1 | <i>H. spontaneum</i> | 12.50% |
| 21 | 5918  | Clipper//WI2291*2/WI2269/5/SLB15-05/4/H.spont.96-3/3/Roho//Alger/Ceres362-1-1                                    | <i>H. spontaneum</i> | 12.50% |
| 17 | 5865  | Moroc9-75//WI2291/CI01387/3/H.spont.41-1/5/Clipper/Volla/3/Arr/Esp//Alger/Ceres362-1-1/4/Hml                     | <i>H. spontaneum</i> | 12.50% |
| 9  | 5849  | Moroc9-75//WI2291/CI01387/3/H.spont.41-1/4/Arta/3/Arar/H.spont.19-15//Hml                                        | <i>H. spontaneum</i> | 12.50% |
| 24 | 5900  | Clipper//WI2291*2/WI2269/5/SLB15-05/4/H.spont.96-3/3/Roho//Alger/Ceres362-1-1                                    | <i>H. spontaneum</i> | 12.50% |
| 13 | 5920  | WI2291/Tadmor/4/ChiCm/An57//Albert/3/Alger/Ceres362-1-1/5/SLB34-40/4/SLB15-05/3/H.spont.21-3/Arar84//WI2291/Bgs  | <i>H. spontaneum</i> | 6.75%  |
| 20 | 5883  | Moroc9-75//WI2291/CI01387/3/H.spont.41-1/5/Clipper/Volla/3/Arr/Esp//Alger/Ceres362-1-1/4/Hml                     | <i>H. spontaneum</i> | 6.75%  |

|                         |       |                                                                                                                 |                      |        |
|-------------------------|-------|-----------------------------------------------------------------------------------------------------------------|----------------------|--------|
| 10                      | 5939  | ChiCm/An57//Albert/3/Alger/Ceres362-1-1/4/Arta/5/SLB15-05/4/H.spont.96-3/3/Roho//Alger/Ceres362-1-1             | <i>H. spontaneum</i> | 25.00% |
| 5                       | 5846  | Clipper//WI2291*2/WI2269/5/SLB15-05/4/H.spont.96-3/3/Roho//Alger/Ceres362-1-1                                   | <i>H. spontaneum</i> | 25.00% |
| 15                      | 5925  | Roho/4/Zanbaka/3/ER/Apm//Lignee131/5/Moroc9-75//WI2291/CI01387/3/H.spont.41-1                                   | <i>H. spontaneum</i> | 37.50% |
| 23                      | 5922  | Soufara-02/3/RM1508/Por//WI2269/4/Hml-02/ArabiAbiad//ER/Apm/5/Moroc9-75//WI2291/CI01387/3/H.spont.41-1          | <i>H. spontaneum</i> | 12.50% |
| 22                      | 5904  | Moroc9-75//WI2291/CI01387/3/H.spont.41-1/5/SLB15-05/4/H.spont.96-3/3/Roho//Alger/Ceres362-1-1                   | <i>H. spontaneum</i> | 25.00% |
| 16                      | 28898 | ChiCm/An57//Albert/3/Alger/Ceres.362-1-1/4/Arta/5/SLB15-05/4/H.spont.96-3/3/Roho//Alger/Ceres362-1-1            | <i>H. spontaneum</i> | 12.50% |
| 8                       | 5895  | Moroc9-75//WI2291/WI2269/5/SLB15-05/4/H.spont.96-3/3/Roho//Alger/Ceres362-1-1                                   | <i>H. spontaneum</i> | 25.00% |
| 6                       | 5929  | Clipper//WI2291*2/WI2269/5/SLB15-05/4/H.spont.96-3/3/Roho//Alger/Ceres362-1-1                                   | <i>H. spontaneum</i> | 12.50% |
| 3                       | 5890  | WI2291/Tadmor/4/ChiCm/An57//Albert/3/Alger/Ceres362-1-1/5/SLB34-40/4/SLB15-05/3/H.spont.21-3/Arar84//WI2291/Bgs | <i>H. spontaneum</i> | 6.75%  |
| 12                      | 5905  | ChiCm/An57//Albert/3/Alger/Ceres362-1-1/4/Arta/5/SLB15-05/4/H.spont.96-3/3/Roho//Alger/Ceres362-1-1             | <i>H. spontaneum</i> | 6.75%  |
| 14                      | 5934  | Zanbaka/5/Pyo/Cam//Avt/RM1508/3/Pon/4/Moroc9-75/ArabiAswad/7/ArabiAbiad/Arar//H.spont.41-5/Tadmor               | <i>H. spontaneum</i> | 12.50% |
| <b>Lentil germplasm</b> |       |                                                                                                                 |                      |        |
| 2018-CWR-1325           | 22519 | ILL4605 (Standard check)                                                                                        | none                 | 0.00%  |
| 2018-CWR-1301           | 4916  | ILL6002/ILWL118/1-1                                                                                             | <i>L. orientalis</i> | 3.125% |

|               |      |                        |                         |        |
|---------------|------|------------------------|-------------------------|--------|
| 2018-CWR-1302 | 4934 | ILL4605/ILWL118/1SPS   | L.<br><i>orientalis</i> | 3.125% |
| 2018-CWR-1303 | 4935 | ILL4605/ILWL118/2SPS   | L.<br><i>orientalis</i> | 3.125% |
| 2018-CWR-1304 | 4936 | ILL4605/ILWL118/3SPS   | L.<br><i>orientalis</i> | 3.125% |
| 2018-CWR-1305 | 4937 | ILL4605/ILWL118/6SPS   | L.<br><i>orientalis</i> | 3.125% |
| 2018-CWR-1306 | 4938 | ILL4605/ILWL118/9SPS   | L.<br><i>orientalis</i> | 3.125% |
| 2018-CWR-1307 | 4944 | ILL7986/ILWL074/10SPS  | L.<br><i>orientalis</i> | 3.125% |
| 2018-CWR-1308 | 20   | ILL6002/ILWL118/1-3    | L.<br><i>orientalis</i> | 3.125% |
| 2018-CWR-1309 | 41   | ILL7978/ILWL118/3-8    | L.<br><i>orientalis</i> | 3.125% |
| 2018-CWR-1310 | 53   | ILL7978/ILWL118/3-1    | L.<br><i>orientalis</i> | 3.125% |
| 2018-CWR-1311 | 56   | ILL7978/ILWL118/1-4    | L.<br><i>orientalis</i> | 3.125% |
| 2018-CWR-1312 | 67   | ILL2585/ILWL90/2       | L.<br><i>orientalis</i> | 3.125% |
| 2018-CWR-1313 | 4633 | ILL7978/ILWL118/3-5    | L.<br><i>orientalis</i> | 3.125% |
| 2018-CWR-1314 | 4638 | ILL7978/ILWL118/3-9    | L.<br><i>orientalis</i> | 3.125% |
| 2018-CWR-1315 | 4652 | ILL7978/ILWL118/1-2    | L.<br><i>orientalis</i> | 3.125% |
| 2018-CWR-1316 | 4653 | ILL7978/ILWL118/5-4    | L.<br><i>orientalis</i> | 3.125% |
| 2018-CWR-1317 | 4732 | ILL2585/ILWL90/9-5     | L.<br><i>orientalis</i> | 3.125% |
| 2018-CWR-1318 | 4733 | ILL7978/ILWL118/2-1    | L.<br><i>orientalis</i> | 3.125% |
| 2018-CWR-1319 | 4741 | Sel-99/209/ILWL118/5-1 | L.<br><i>orientalis</i> | 3.125% |

|               |      |                     |                          |        |
|---------------|------|---------------------|--------------------------|--------|
| 2018-CWR-1320 | 4675 | ILL7978/ILWL118/5-2 | <i>L.<br/>orientalis</i> | 3.125% |
| 2018-CWR-1321 | 4688 | ILL7978/ILWL118/3-2 | <i>L.<br/>orientalis</i> | 3.125% |
| 2018-CWR-1322 | 4704 | ILL2585/ILWL90/11   | <i>L.<br/>orientalis</i> | 3.125% |
| 2018-CWR-1323 | 4717 | ILL2585/ILWL90/4-3  | <i>L.<br/>orientalis</i> | 3.125% |
| 2018-CWR-1324 | 4757 | ILL7978/ILWL118/2-7 | <i>L.<br/>orientalis</i> | 3.125% |

**Table S2.** Experimental farms used for field evaluation during the seasons 2018-2019 and 2019-2020

| Location           | Country  | Season    | Grain yield average |        |        | Altitude<br>(m a.s.l.) | Soil            | Climate                          | Temperature<br>(°C) |      | Moisture<br>(mm) |
|--------------------|----------|-----------|---------------------|--------|--------|------------------------|-----------------|----------------------------------|---------------------|------|------------------|
|                    |          |           | Durum               | Barley | Lentil |                        |                 |                                  | Tmin                | Tmax |                  |
| <b>Akkar</b>       | Lebanon  | 2019-2020 | 4115                | -      | -      | 30                     | Sandy clay      | Mediterranean/temperate          | 6.9                 | 28.0 | 823              |
| <b>Annoceur</b>    | Morocco  | 2018-2019 | 1360                | 2648   | -      | 1440                   | Lime-clay       | Mediterranean/warm and temperate | 10.8                | 27.7 | 251              |
|                    |          | 2019-2020 | 3717                | 4431   | 1314   |                        |                 |                                  | 10.9                | 26.6 | 423              |
| <b>Debre Zeit</b>  | Ethiopia | 2019-2020 | 1685                | 657    | 536    | 1880                   | Vertisol        | Subtropical highland             | 13.5                | 25.0 | 580              |
| <b>Dheraa</b>      | Ethiopia | 2019-2020 | 3335                | 1690   | 1505   | 2200                   | Light soil      | Tepid semi-arid mid highlands    | 13.4                | 26.0 | 540              |
| <b>Fanaye</b>      | Senegal  | 2019-2020 | 2946                | 843    | 327    | 17                     | Sandy clay      | Sahelian climate                 | 14.7                | 35.2 | 380              |
| <b>Jemaa Shaim</b> | Morocco  | 2018-2019 | -                   | 3660   | -      | 170                    | Calcic cambisol | Hot steppe                       | 13.1                | 25.6 | 216              |
| <b>Kfardan</b>     | Lebanon  | 2018-2019 | 3578                | -      | -      | 1050                   | Vertisol        | Mediterranean/temperate          | 4.6                 | 17.4 | 533              |
|                    |          | 2019-2020 | 5822                | 4977   | -      |                        |                 |                                  | 5.6                 | 18.7 | 516              |
| <b>Marchouch</b>   | Morocco  | 2018-2019 | 5148                | 2834   | 1272   | 398                    | Clay vertisol   | Mediterranean/warm and temperate | 6.2                 | 21.0 | 285              |
|                    |          | 2019-2020 | 858                 | 2545   | 808    |                        |                 |                                  | 7.6                 | 21.1 | 230              |

|                     |         |           |      |      |      |     |                  |                                 |     |      |     |
|---------------------|---------|-----------|------|------|------|-----|------------------|---------------------------------|-----|------|-----|
| <b>Melk Zhar</b>    | Morocco | 2019-2020 | 5091 | -    | -    | 137 | Sandy limestone  | Mediterranean/hot and temperate | 9.6 | 23.7 | 430 |
| <b>Sidi el Aidi</b> | Morocco | 2018-2019 | 1714 | 2145 | -    | 226 | Vertisol         | Mediterranean/hot and temperate | 8.4 | 25.0 | 216 |
|                     |         | 2019-2020 | 1777 | 521  | 237  |     |                  |                                 | 7.6 | 23.0 | 206 |
| <b>Tel Amara</b>    | Lebanon | 2018-2019 | 3800 | -    | -    | 915 | Eutric cambisols | Mediterranean/temperate         | 8.4 | 25.6 | 770 |
|                     |         | 2019-2020 | 3920 | -    | -    |     |                  |                                 | 7.3 | 23.5 | 727 |
| <b>Terbol</b>       | Lebanon | 2018-2019 | 6365 | -    | -    | 897 | Chromic vertisol | Mediterranean/temperate         | 6.9 | 18.7 | 732 |
|                     |         | 2019-2020 | 6220 | 5428 | 2187 |     |                  |                                 | 3.9 | 18.6 | 697 |
| <b>Tessaout</b>     | Morocco | 2018-2019 | 5584 | 3974 | -    | 472 | Calcic Xerosols  | Hot steppe                      | 7.3 | 24.2 | 448 |
|                     |         | 2019-2020 | 2422 | 3150 | 1261 |     |                  |                                 | 4.1 | 26.3 | 374 |

---

**Table S3.** Essential management practices for durum wheat, barley and lentil on the different experimental sites.

| Site                | Durum wheat                    |                                                   | Barley                        |                                                | Lentil        |                                             | Irrigation System |
|---------------------|--------------------------------|---------------------------------------------------|-------------------------------|------------------------------------------------|---------------|---------------------------------------------|-------------------|
|                     | Fertilization                  | Weeding treatment                                 | Fertilization                 | Weeding treatment                              | Fertilization | Weeding treatment                           |                   |
| <b>Akkar20</b>      | NPK-15-15-15;<br>Urea 46%      | 2.4 D-Deer @1.5 L/ha                              |                               | -                                              |               | -                                           | Rainfed           |
| <b>Annoceur19</b>   | NPK-15-15-15;<br>NH4NO3-33-0-0 | PALLAS 45 OD 0.5 l/ha;<br>MUSTANG 306 SE 0.6 l/ha | NPK15-15-15;<br>NH4NO3-33-0-0 | AXIAL 045 EC 1l/ha;<br>MUSTANG 306 SE 0.6 l/ha |               | -                                           | Sprinkle          |
| <b>Annoceur20</b>   | NPK-15-15-15;<br>NH4NO3-33-0-0 | PALLAS 45 OD 0.5 l/ha;<br>MUSTANG 306 SE 0.6 l/ha | NPK15-15-15;<br>NH4NO3-33-0-0 | AXIAL 045 EC 1l/ha;<br>MUSTANG 306 SE 0.6 l/ha | NPK-6-20-30   | Pre-emergence<br>Herbicide “Challenge® 600” | Sprinkle          |
| <b>DebreZeit20</b>  | NPK-15-15-15;<br>Urea 46%      | Mechanical                                        | NPK15-15-15                   | Mechanical                                     | none          | Mechanical                                  | Rainfed           |
| <b>Dheraa20</b>     | NPK-15-15-15;<br>Urea 46%      | Mechanical                                        | NPK15-15-15                   | Mechanical                                     | none          | Mechanical                                  | Rainfed           |
| <b>Fanaye20</b>     | NPK-15-15-15;<br>Urea 46%      | Mechanical                                        | NPK-15-15-15;<br>Urea 46%     | Mechanical                                     | NPK-15-15-15  | Mechanical                                  | Gravity           |
| <b>JemaaShaim19</b> | -                              | -                                                 | NPK15-15-15;<br>NH4NO3-33-0-0 | Mechanical                                     |               | -                                           | Rainfed           |
| <b>Kfardan19</b>    | NPK-15-15-15;<br>Urea 46%      | 2.4 D-Deer @1.5 L/ha; Pallas @ 400 cc/ha          |                               | -                                              |               | -                                           | Rainfed           |
| <b>Kfardan20</b>    | NPK-15-15-15;<br>Urea 46%      | 2.4 D-Deer @1.5 L/ha; Pallas @ 400 cc/ha          | NPK15-15-15                   | 2,4-D 1.25 L/ha                                |               | -                                           | Rainfed           |
| <b>Marchouch19</b>  | NPK-15-15-15;<br>NH4NO3-33-0-0 | PALLAS 45 OD 0.5 l/ha;<br>MUSTANG 306 SE 0.6 l/ha | NPK15-15-15;<br>NH4NO3-33-0-0 | AXIAL 045 EC 1l/ha;<br>MUSTANG 306 SE 0.6 l/ha | NPK-6-20-30   | Pre-emergence<br>Herbicide “Challenge® 600” | Rainfed           |



|                       |                                     |                                                   |                               |                                                |                 |                                                |          |
|-----------------------|-------------------------------------|---------------------------------------------------|-------------------------------|------------------------------------------------|-----------------|------------------------------------------------|----------|
| <b>Marchouch20</b>    | NPK-15-15-15;<br>NH4NO3-33-0-0      | PALLAS 45 OD 0.5 l/ha;<br>MUSTANG 306 SE 0.6 l/ha | NPK15-15-15;<br>NH4NO3-33-0-0 | AXIAL 045 EC 1l/ha;<br>MUSTANG 306 SE 0.6 l/ha | NPK-6-<br>20-30 | Pre-emergence<br>Herbicide “Challenge®<br>600” | Rainfed  |
| <b>Melk Zhar20</b>    | 50-50-50 U of N;<br>50 U of P and K | DERBY 175 SC 50 cc/ha                             |                               | -                                              |                 | -                                              | Drip     |
| <b>Sidi el Aidi19</b> | NPK-15-15-15;<br>NH4NO3-33-0-0      | PALLAS 45 OD 0.5 l/ha;<br>MUSTANG 306 SE 0.6 l/ha | NPK15-15-15;<br>NH4NO3-33-0-0 | AXIAL 045 EC 1l/ha;<br>MUSTANG 306 SE 0.6 l/ha |                 | -                                              | Rainfed  |
| <b>Sidi el Aidi20</b> | NPK-15-15-15;<br>NH4NO3-33-0-0      | PALLAS 45 OD 0.5 l/ha;<br>MUSTANG 306 SE 0.6 l/ha | NPK15-15-15;<br>NH4NO3-33-0-0 | AXIAL 045 EC 1l/ha;<br>MUSTANG 306 SE 0.6 l/ha | NPK-6-<br>20-30 | Pre-emergence<br>Herbicide “Challenge®<br>600” | Rainfed  |
| <b>Tel Amara19</b>    | NPK-15-15-15;<br>Urea 46%           | 2.4 D-Deer @1.5 L/ha                              |                               | -                                              |                 | -                                              | Sprinkle |
| <b>Tel Amara20</b>    | NPK-15-15-15;<br>Urea 46%           | 2.4 D-Deer @1.5 L/ha                              |                               | -                                              |                 | -                                              | Sprinkle |
| <b>Terbol19</b>       | NPK-15-15-15;<br>Urea 46%           | 2.4 D-Deer @1.5 L/ha                              |                               | -                                              |                 | -                                              | Sprinkle |
| <b>Terbol20</b>       | NPK-15-15-15;<br>Urea 46%           | 2.4 D-Deer @1.5 L/ha                              | NPK15-15-15;<br>NH4NO3-33-0-0 | 2,4-D 1.25 L/ha                                | NPK-6-<br>20-30 | Pre-emergence<br>Herbicide “Challenge®<br>600” | Sprinkle |
| <b>Tessaout19</b>     | NPK-15-15-15;<br>NH4NO3-33-0-0      | PALLAS 45 OD 0.5 l/ha;<br>MUSTANG 306 SE 0.6 l/ha | NPK15-15-15;<br>NH4NO3-33-0-0 | AXIAL 045 EC 1l/ha;<br>MUSTANG 306 SE 0.6 l/ha |                 | -                                              | Gravity  |
| <b>Tessaout20</b>     | NPK-15-15-15;<br>NH4NO3-33-0-0      | PALLAS 45 OD 0.5 l/ha;<br>MUSTANG 306 SE 0.6 l/ha | NPK15-15-15;<br>NH4NO3-33-0-0 | AXIAL 045 EC 1l/ha;<br>MUSTANG 306 SE 0.6 l/ha | NPK-6-<br>20-30 | Pre-emergence<br>Herbicide “Challenge®<br>600” | Gravity  |

---

**Table S4.** Analysis of variance for all traits of durum wheat, barley and lentil across locations, the value of each Source of variation (SOV: E, G, and GxE) is presented as ratio of the total variation.

| Traits                  | SOV | Durum wheat |          | Barley |          | Lentil |          |
|-------------------------|-----|-------------|----------|--------|----------|--------|----------|
|                         |     | Df          | Value    | Df     | value    | Df     | Value    |
| GY                      | G   | 23          | 1.80***  | 27     | 6.35***  | 24     | 4.38***  |
|                         | E   | 18          | 85.24*** | 8      | 67.19*** | 8      | 72.11*** |
|                         | GxE | 414         | 7.15***  | 216    | 17.41*** | 190    | 13.82*** |
|                         | H2  |             | 0.79     |        | 0.70     |        | 0.53     |
|                         | CV  |             | 12.92    |        | 18.56    |        | 25.62    |
|                         | Max |             | 3980.90  |        | 3196.55  |        | 1112.66  |
|                         | LSD |             | 213.70   |        | 375.70   |        | 162.80   |
| TSW                     | G   | 23          | 5.37***  | 27     | 16.06*** | 24     | 41.01*** |
|                         | E   | 18          | 79.60*** | 8      | 62.58*** | 8      | 23.18*** |
|                         | GxE | 414         | 6.91***  | 216    | 14.85*** | 192    | 23.13*** |
|                         | H2  |             | 0.93     |        | 0.88     |        | 0.97     |
|                         | CV  |             | 8.88     |        | 5.40     |        | 6.38     |
|                         | Max |             | 45.76    |        | 51.97    |        | 52.13    |
|                         | LSD |             | 1.98     |        | 2.77     |        | 5.85     |
| DTH (D50<br>for lentil) | G   | 23          | 0.34***  | 27     | 5.64***  | 24     | 3.89***  |
|                         | E   | 16          | 98.49*** | 7      | 89.56*** | 7      | 89.74*** |
|                         | GxE | 368         | 0.59***  | 189    | 2.93**   | 168    | 4.72***  |
|                         | H2  |             | 0.88     |        | 0.92     |        | 0.78     |
|                         | CV  |             | 2.18     |        | 2.37     |        | 3.84     |
|                         | Max |             | 114.13   |        | 108.15   |        | 65.44    |
|                         | LSD |             | 1.01     |        | 1.67     |        | 1.34     |
| DTM                     | G   | 23          | 0.11***  | 27     | 3.37***  | 24     | 1.25***  |
|                         | E   | 10          | 99.39*** | 6      | 90.25*** | 8      | 93.79*** |
|                         | GxE | 230         | 0.26***  | 162    | 3.75***  | 192    | 4.28***  |
|                         | H2  |             | 0.74     |        | 0.78     |        | 0.61     |
|                         | CV  |             | 1.20     |        | 2.15     |        | 2.33     |
|                         | Max |             | 147.55   |        | 149.51   |        | 116.33   |
|                         | LSD |             | 0.84     |        | 2.10     |        | 1.54     |
| PLH                     | G   | 23          | 4.45***  | 27     | 2.39***  | 24     | 5.63***  |
|                         | E   | 17          | 79.84*** | 8      | 88.88*** | 7      | 62.57*** |
|                         | GxE | 391         | 6.82***  | 216    | 5.43***  | 168    | 15.42*** |
|                         | H2  |             | 0.92     |        | 0.72     |        | 0.38     |
|                         | CV  |             | 4.85     |        | 6.23     |        | 14.45    |
|                         | Max |             | 93.34    |        | 82.70    |        | 29.94    |
|                         | LSD |             | 1.90     |        | 3.36     |        | 2.24     |
| GL                      | G   | 23          | 33.00*** | 27     | 65.65*** | 24     | 76.99*** |
|                         | E   | 8           | 46.98*** | 7      | 17.67*** | 4      | 3.77***  |
|                         | GxE | 184         | 9.14***  | 189    | 12.85*** | 96     | 16.15*** |

|    |     |     |          |     |          |    |          |
|----|-----|-----|----------|-----|----------|----|----------|
|    | H2  |     | 0.95     |     | 0.97     |    | 0.98     |
|    | CV  |     | 1.77     |     | 2.42     |    | 1.96     |
|    | Max |     | 7.45     |     | 8.88     |    | 6.06     |
|    | LSD |     | 0.10     |     | 0.27     |    | 0.22     |
| GW | G   | 23  | 14.49*** | 27  | 71.77*** | 24 | 74.70*** |
|    | E   | 8   | 76.58*** | 7   | 18.93*** | 4  | 6.85***  |
|    | GxE | 184 | 4.57***  | 189 | 7.48***  | 96 | 14.44*** |
|    | H2  |     | 0.94     |     | 0.97     |    | 0.93     |
|    | CV  |     | 1.93     |     | 1.44     |    | 2.60     |
|    | Max |     | 3.41     |     | 3.41     |    | 5.52     |
|    | LSD |     | 0.06     |     | 0.07     |    | 0.20     |

GY, grain yield; TSW; 1000-seed weight, DTH; days to heading cereals, D50F; days to flowering for lentil, DTM; days to maturity, PLH; plant height, GL; grain length, GW; grain width. \* p<0.05, \*\*p<0.01 and \*\*\*p<0.001

**Table S5.** Grain yield (kg ha<sup>-1</sup>), plant height (cm), and phenological traits for durum wheat, barley and lentil across environments.

| Genotype           | GY      | PLH   | DTH(D50F) | DTM    |
|--------------------|---------|-------|-----------|--------|
| <b>Durum wheat</b> |         |       |           |        |
| 800034117          | 3887.08 | 89.24 | 109.84    | 144.39 |
| Bonidur            | 3703.18 | 90.11 | 109.60    | 146.26 |
| Chicca             | 3502.43 | 90.08 | 112.43    | 145.75 |
| 800034692          | 3580.16 | 90.13 | 111.74    | 145.84 |
| Faraj              | 3506.73 | 88.38 | 113.65    | 147.48 |
| 600100438          | 3797.67 | 81.86 | 111.72    | 145.87 |
| 800018534          | 3948.03 | 89.56 | 110.09    | 145.26 |
| 600108182          | 3755.18 | 85.09 | 109.91    | 145.30 |
| 800031875          | 3513.36 | 90.91 | 110.92    | 145.99 |
| 800031458          | 3676.43 | 93.34 | 109.12    | 145.23 |
| 800018565          | 3556.88 | 90.68 | 111.80    | 146.37 |
| 800034676          | 3390.01 | 87.82 | 110.03    | 145.30 |
| 800031879          | 3563.58 | 89.23 | 111.25    | 145.13 |
| 800031880          | 3351.52 | 86.11 | 114.13    | 147.01 |
| 800031881          | 3400.59 | 89.40 | 112.28    | 146.69 |
| 800018569          | 3811.86 | 91.42 | 110.23    | 145.40 |
| Karim              | 3294.61 | 85.19 | 112.73    | 147.55 |
| Kundermiki         | 3740.40 | 86.75 | 110.64    | 145.35 |
| 800032178          | 3881.71 | 88.39 | 109.22    | 144.19 |
| Nachit             | 3840.82 | 89.04 | 110.19    | 144.93 |
| Sahi               | 3740.86 | 86.20 | 111.40    | 145.64 |
| 800018541          | 3642.85 | 91.98 | 109.57    | 144.85 |
| Zagharin2          | 3664.62 | 91.14 | 109.76    | 145.37 |
| 273403             | 3980.90 | 84.11 | 112.17    | 146.27 |
| <b>Barley</b>      |         |       |           |        |
| 5873               | 3129.94 | 77.12 | 98.26     | 142.18 |

|               |         |       |        |        |
|---------------|---------|-------|--------|--------|
| 5939          | 2876.84 | 79.76 | 103.03 | 145.08 |
| 28897         | 2919.29 | 78.11 | 100.79 | 143.59 |
| 5905          | 3030.58 | 81.77 | 102.36 | 145.66 |
| 5920          | 2749.74 | 82.02 | 104.45 | 144.72 |
| 5934          | 2699.06 | 80.49 | 105.85 | 147.01 |
| 5925          | 2826.99 | 80.47 | 101.36 | 145.17 |
| 28898         | 2768.16 | 80.14 | 107.82 | 149.06 |
| 5865          | 2420.34 | 76.14 | 104.88 | 145.85 |
| 28899         | 3196.55 | 80.18 | 102.20 | 145.61 |
| 5935          | 2905.92 | 82.70 | 102.47 | 145.13 |
| 28895         | 3009.74 | 75.71 | 104.03 | 146.63 |
| 5883          | 2534.09 | 79.13 | 101.08 | 145.02 |
| 5918          | 3013.98 | 82.01 | 102.23 | 145.63 |
| 5904          | 2808.49 | 81.05 | 97.19  | 141.76 |
| 5922          | 2562.42 | 79.58 | 102.41 | 145.06 |
| 5900          | 2749.72 | 82.48 | 103.56 | 146.43 |
| WI2291        | 3195.98 | 78.01 | 100.92 | 143.29 |
| Rihane03      | 3140.55 | 75.92 | 104.85 | 146.67 |
| Furat-3       | 3101.97 | 74.59 | 103.22 | 145.36 |
| Tamellalt     | 2933.24 | 77.52 | 108.15 | 149.52 |
| 5890          | 2673.65 | 81.19 | 104.89 | 147.27 |
| 28896         | 3065.25 | 77.37 | 100.82 | 143.28 |
| 5846          | 3092.36 | 80.83 | 101.14 | 144.34 |
| 5929          | 3040.71 | 79.38 | 96.37  | 143.13 |
| 5864          | 2431.17 | 78.47 | 102.75 | 145.26 |
| 5895          | 3148.59 | 80.23 | 100.70 | 144.25 |
| 5849          | 2583.49 | 78.63 | 103.51 | 145.35 |
| <hr/>         |         |       |        |        |
| <b>Lentil</b> |         |       |        |        |
| 4916          | 1049.17 | 29.94 | 59.64  | 112.40 |
| 53            | 1061.14 | 27.88 | 64.28  | 114.39 |
| 56            | 975.31  | 27.71 | 65.45  | 116.25 |
| 67            | 905.41  | 28.23 | 63.91  | 114.46 |
| 4633          | 1085.71 | 27.00 | 62.79  | 114.38 |
| 4638          | 1090.55 | 28.00 | 62.80  | 113.81 |
| 4652          | 1058.43 | 27.56 | 61.47  | 113.97 |
| 4653          | 1112.66 | 27.51 | 64.04  | 116.33 |
| 4732          | 951.69  | 27.02 | 64.32  | 115.85 |
| 4733          | 1013.40 | 27.55 | 60.80  | 113.28 |
| 4741          | 908.83  | 29.46 | 62.39  | 114.38 |
| 4934          | 1037.70 | 27.79 | 59.38  | 110.94 |
| 4675          | 1045.73 | 27.57 | 61.94  | 115.52 |
| 4688          | 863.66  | 27.01 | 59.90  | 110.96 |
| 4704          | 934.88  | 28.14 | 58.89  | 110.99 |
| 4717          | 980.38  | 27.94 | 63.56  | 114.32 |
| 4757          | 1105.67 | 27.20 | 60.75  | 113.38 |
| Bakria        | 1074.58 | 28.55 | 59.28  | 110.84 |

|      |         |       |       |        |
|------|---------|-------|-------|--------|
| 4935 | 1084.35 | 28.20 | 59.58 | 111.31 |
| 4936 | 1067.85 | 27.91 | 58.85 | 110.72 |
| 4937 | 1050.62 | 27.95 | 59.88 | 111.46 |
| 4938 | 1072.95 | 27.84 | 58.87 | 110.49 |
| 4944 | 963.10  | 27.99 | 63.16 | 113.65 |
| 20   | 1012.68 | 29.18 | 60.46 | 113.78 |
| 41   | 1025.16 | 27.49 | 63.30 | 115.70 |

GY; grain yield, DTH; days to heading cereals, D50F; days to flowering for lentil, DTM; days to maturity, PLH; plant height.

**Table S6.** Analysis of variance for the traits of the 8 selected entries of barley across Lebanon, Senegal and Ethiopia environments conducted during 2019-2020 cropping season. the value of each Source of variation (SOV: G, E, and GxE) is presented as ratio of the total variation.

| SOV            | df | GY      | TSW    | DTH    | DTM    | PLH    |
|----------------|----|---------|--------|--------|--------|--------|
| G              | 7  | 1.83*   | 6.09*  | 0.09*  | 0.16*  | 7.25*  |
| E              | 4  | 94.10*  | 69.41* | 99.76* | 99.63* | 69.21* |
| GxE            | 28 | 3.73*   | 22.78* | 0.13*  | 0.19*  | 22.06* |
| H <sup>2</sup> |    | 0.26    | 0.62   | 0.60   | 0.64   | 0.85   |
| CV             |    | 5.25    | 4.08   | 0.93   | 0.64   | 3.38   |
| Max            |    | 4269.17 | 50.07  | 108.67 | 145.00 | 101.67 |
| LSD            |    | 402.27  | 3.53   | 3.35   | 2.12   | 8.64   |

GY, grain yield; TSW; 1000-seed weight, DTH; days to heading, DTM; days to maturity, PLH; plant height. \* p<0.001.

**Table S7.** Analysis of variance for quality traits of durum wheat, barley and lentil across locations, the value of each Source of variation (SOV: E, G, and GxE) is presented as ratio of the total variation.

| Traits | SOV            | Durum wheat |          | Barley |          | Lentil |          |
|--------|----------------|-------------|----------|--------|----------|--------|----------|
|        |                | Df          | Value    | Df     | Value    | Df     | Value    |
| GPC    | G              | 23          | 22.15*** | 27     | 4.88***  | 24     | 22.92*** |
|        | E              | 8           | 28.47*** | 7      | 81.76*** | 4      | 54.78*** |
|        | GxE            | 184         | 34.59*** | 189    | 8.73***  | 96     | 15.09*** |
|        | H <sup>2</sup> |             | 0.65     |        | 0.72     |        | 0.79     |
|        | CV             |             | 4.47     |        | 5.00     |        | 1.08     |
|        | Max            |             | 13.97    |        | 13.96    |        | 24.27    |
|        | LSD            |             | 0.24     |        | 0.47     |        | 0.13     |
| Fe     | G              | 23          | 16.17*** | 27     | 6.55***  | 24     | 18.99*** |
|        | E              | 8           | 24.28*** | 7      | 54.66*** | 4      | 23.12*** |
|        | GxE            | 184         | 39.22*** | 189    | 33.14*** | 96     | 55.12*** |
|        | H <sup>2</sup> |             | 0.20     |        | 0.20     |        | 0.63     |
|        | CV             |             | 41.00    |        | 12.00    |        | 9.10     |
|        | Max            |             | 30.90    |        | 41.52    |        | 78.24    |
|        | LSD            |             | 3.16     |        | 3.03     |        | 2.61     |
| Zn     | G              | 23          | 2.94*    | 27     | 3.30     |        | 18.13*** |

|          |     |     |          |     |          |          |
|----------|-----|-----|----------|-----|----------|----------|
|          | E   | 8   | 69.46*** | 7   | 49.98*** | 32.11*** |
|          | GxE | 184 | 9.90     | 189 | 26.64**  | 46.22*** |
|          | H2  |     | 0.29     |     | 0.10     | 0.45     |
|          | CV  |     | 20.00    |     | 5.00     | 9.49     |
|          | Max |     | 35.84    |     | 37.38    | 61.24    |
|          | LSD |     | 2.67     |     | 3.98     | 2.43     |
| YI       | G   | 23  | 35.95*** |     |          |          |
|          | E   | 8   | 34.95*** |     |          |          |
|          | GxE | 184 | 22.31*** |     |          |          |
|          | H2  |     | 0.79     |     |          |          |
|          | CV  |     | 4.69     |     |          |          |
|          | Max |     | 18.42    |     |          |          |
|          | LSD |     | 0.23     |     |          |          |
| MIXO     | G   | 23  | 47.71*** |     |          |          |
|          | E   | 3   | 5.01***  |     |          |          |
|          | GxE | 69  | 27.51*** |     |          |          |
|          | H2  |     | 0.93     |     |          |          |
|          | CV  |     | 14.16    |     |          |          |
|          | Max |     | 7.31     |     |          |          |
|          | LSD |     | 0.36     |     |          |          |
| β-glucan | G   |     |          | 27  | 9.24***  |          |
|          | E   |     |          | 7   | 28.67    |          |
|          | GxE |     |          | 189 | 38.09*** |          |
|          | H2  |     |          |     | 0.33     |          |
|          | CV  |     |          |     | 22.00    |          |
|          | Max |     |          |     | 5.81     |          |
|          | LSD |     |          |     | 0.91     |          |

GPC; grain protein content, Fe; iron content, Zn; zinc content, YI; yellow pigment index, MIXO; mixo-score. \* p<0.05, \*\*p<0.01 and \*\*\*p<0.001.

**Table S8.** Grain yield (kg ha<sup>-1</sup>), plant height (cm), 1000-seed weight (g) and phenological traits of the eight CWR elites of barley at Terbol20, Kfardan20, Debre Zeit20, Dheraa20 and Fanaye20.

| Genotype                 | GY      | DTH    | DTM    | PLH    | TSW   |
|--------------------------|---------|--------|--------|--------|-------|
| Terbol20 environment     |         |        |        |        |       |
| 5873                     | 6080.83 | 133.50 | 171.50 | 101.50 | 49.25 |
| 28896                    | 5250.83 | 134.50 | 174.00 | 101.50 | 51.90 |
| 5846                     | 5826.67 | 132.50 | 172.50 | 109.00 | 50.65 |
| 5895                     | 5023.33 | 134.50 | 174.50 | 101.00 | 49.20 |
| 5939                     | 4530.00 | 134.50 | 174.50 | 104.50 | 49.10 |
| 5918                     | 6136.67 | 134.00 | 174.00 | 105.00 | 54.60 |
| Furat-3                  | 4985.00 | 129.50 | 170.00 | 81.00  | 49.25 |
| Chams                    | 5584.17 | 135.00 | 176.00 | 94.50  | 46.25 |
| Kfardan20 environment    |         |        |        |        |       |
| 5873                     | 5477.50 | 132.00 | 171.00 | 106.50 | 44.85 |
| 28896                    | 5055.83 | 133.50 | 172.50 | 102.50 | 45.20 |
| 5846                     | 4187.50 | 130.00 | 172.50 | 112.50 | 49.80 |
| 5895                     | 5067.50 | 131.00 | 173.00 | 108.50 | 48.50 |
| 5939                     | 4338.33 | 132.00 | 172.50 | 109.00 | 43.30 |
| 5918                     | 4915.00 | 132.50 | 171.50 | 109.50 | 49.90 |
| Furat-3                  | 5303.33 | 131.00 | 168.50 | 89.50  | 47.05 |
| Chams                    | 5474.17 | 135.00 | 175.00 | 108.50 | 39.55 |
| Debre Zeit20 environment |         |        |        |        |       |
| 5873                     | 583.33  | 48.00  | 69.00  | 70.00  | 28.00 |
| 28896                    | 293.33  | 50.00  | 68.00  | 65.00  | 34.00 |
| 5846                     | 318.33  | 48.00  | 72.00  | 65.00  | 30.00 |
| 5895                     | 430.00  | 48.00  | 70.00  | 60.00  | 36.00 |
| 5939                     | 441.67  | 50.00  | 75.00  | 80.00  | 30.00 |
| 5918                     | 696.67  | 51.00  | 76.00  | 80.00  | 34.00 |
| Furat-3                  | 981.67  | 47.00  | 69.00  | 75.00  | 36.00 |
| Arsi                     | 1515.00 | 52.00  | 83.00  | 110.00 | 40.00 |
| Dheraa20 environment     |         |        |        |        |       |
| 5873                     | 2785.00 | 50.00  | 83.00  | 85.00  | 36.00 |
| 28896                    | 2948.33 | 51.00  | 85.00  | 85.00  | 48.00 |
| 5846                     | 1535.00 | 49.00  | 80.00  | 90.00  | 32.00 |
| 5895                     | 1671.67 | 49.00  | 82.00  | 85.00  | 44.00 |
| 5939                     | 821.67  | 49.00  | 80.00  | 80.00  | 28.00 |
| 5918                     | 863.33  | 54.00  | 80.00  | 80.00  | 28.00 |
| Furat-3                  | 1468.33 | 49.00  | 77.00  | 80.00  | 28.00 |
| Arsi                     | 1426.67 | 55.00  | 85.00  | 85.00  | 40.00 |
| Fanaye20 environment     |         |        |        |        |       |
| 5873                     | 1249.70 | 53.50  | 83.50  | 72.13  | 48.00 |
| 28896                    | 912.00  | 55.00  | 84.00  | 72.50  | 47.00 |
| 5846                     | 1134.00 | 53.50  | 82.00  | 83.38  | 45.50 |
| 5895                     | 582.00  | 54.00  | 85.00  | 75.00  | 52.50 |
| 5939                     | 812.00  | 59.50  | 86.00  | 75.38  | 49.00 |

|         |        |       |       |       |       |
|---------|--------|-------|-------|-------|-------|
| 5918    | 540.00 | 56.00 | 86.00 | 70.00 | 45.50 |
| Furat-3 | 990.00 | 57.00 | 85.00 | 69.75 | 49.00 |
| Ksiba   | 528.00 | 52.50 | 84.00 | 69.00 | 42.50 |

GY; grain yield, DTH; days to heading, DTM; days to maturity, PLH; plant height, TSW; 1000-seed weight.

**Table S9.** Pearson correlation between grain yield, plant height, days to flowering and climatic matrix of durum wheat, barley and lentil across all environments.

|                       | GY     |        |        | PLH   |        |        | DTH     |        | D50F    |
|-----------------------|--------|--------|--------|-------|--------|--------|---------|--------|---------|
|                       | Durum  | Barley | Lentil | Durum | Barley | Lentil | Durum   | Barley | Lentil  |
| T <sub>min</sub> (BS) | -0.28  | 0.25   | -0.38  | -0.33 | -0.50  | 0.31   | -0.69** | -0.27  | -0.84** |
| T <sub>min</sub> (VS) | -0.45  | 0.04   | -0.42  | -0.46 | -0.42  | 0.22   | -0.82** | 0.55   | -0.76*  |
| T <sub>min</sub> (F)  | -0.36  | 0.37   | -0.25  | -0.18 | -0.05  | 0.03   | -0.52*  | 0.54   | -0.52   |
| T <sub>min</sub> (GF) | -0.20  | 0.43   | -0.42  | -0.11 | -0.07  | 0.16   | -0.43   | 0.48   | -0.51   |
| T <sub>min</sub> (M)  | -0.20  | 0.20   | -0.40  | -0.11 | -0.18  | 0.01   | -0.25   | 0.56   | -0.28   |
| T <sub>max</sub> (BS) | -0.17  | -0.45  | -0.29  | -0.35 | -0.67  | 0.45   | -0.50*  | 0.55   | -0.60   |
| T <sub>max</sub> (VS) | -0.46* | 0.22   | -0.77* | -0.33 | 0.21   | 0.38   | -0.68** | 0.46   | -0.09   |
| T <sub>max</sub> (F)  | -0.50* | 0.21   | -0.67  | -0.26 | 0.27   | 0.49   | -0.49*  | 0.30   | -0.10   |
| T <sub>max</sub> (GF) | -0.18  | 0.70*  | -0.56  | -0.10 | 0.47   | 0.51   | -0.21   | 0.13   | -0.12   |
| T <sub>max</sub> (M)  | 0.14   | 0.37   | -0.14  | 0.23  | 0.48   | 0.14   | 0.13    | 0.43   | 0.28    |
| Rh(BS)                | -0.13  | -0.08  | 0.04   | 0.19  | 0.44   | -0.65  | 0.28    | -0.16  | 0.45    |
| Rh(VS)                | 0.05   | -0.23  | 0.44   | 0.25  | 0.37   | -0.55  | 0.39    | -0.60  | 0.25    |
| Rh(F)                 | 0.07   | 0.08   | 0.38   | 0.20  | 0.06   | -0.60  | 0.32    | -0.48  | 0.25    |
| Rh(GF)                | -0.20  | -0.42  | 0.34   | -0.05 | -0.01  | -0.57  | 0.10    | -0.27  | 0.44    |
| Rh(M)                 | -0.30  | -0.22  | 0.09   | -0.17 | -0.02  | -0.46  | -0.01   | -0.44  | 0.47    |
| WI(BS)                | -0.11  | -0.01  | 0.00   | 0.02  | -0.03  | -0.20  | -0.35   | -0.16  | -0.63   |
| WI(VS)                | 0.59** | 0.47   | 0.71*  | 0.49* | 0.75*  | -0.10  | 0.37    | -0.36  | -0.47   |
| WI(F)                 | -0.11  | 0.50   | 0.10   | -0.05 | 0.62   | -0.09  | -0.41   | 0.02   | 0.70    |
| WI(GF)                | -0.05  | 0.73*  | 0.32   | 0.03  | 0.70*  | 0.39   | -0.24   | -0.16  | -0.09   |
| WI(M)                 | 0.20   | -0.03  | 0.49   | -0.12 | 0.22   | -0.13  | 0.13    | -0.35  | 0.12    |

T<sub>min</sub>, average minimum daily temperature; T<sub>max</sub>, average maximum daily temperature, Rh, relative humidity; WI, water input in mm. In each climatic factor, BS corresponds to one month before sowing; VS, vegetative stage; F, flowering period; GF, grain filling period; M, maturity period, \* p<0.05 and \*\*<0.01.



**Table S10.** Pearson correlation coefficient between grain yield and plant height, days to heading, days to 50%flowering for lentil, days to maturity and 1000-seeds weight per cluster in durum wheat, barley and lentil.

| Crop        | Cluster | Trait       | PLH    | DTH/D50F | DTM     | TSW    |
|-------------|---------|-------------|--------|----------|---------|--------|
| Durum wheat | E1      | Grain yield | -0.02  | 0.44**   | 0.50**  | 0.41** |
|             | E2      |             | 0.39   | 0.51**   | 0.73**  | 0.63** |
|             | E3      |             | 0.16   | 0.15     | 0.15    | 0.10   |
|             | E4      |             | 0.29   | -0.46**  | -0.82** | 0.19   |
|             | E5      |             | -0.48* | -0.20    | -0.43** | -0.04  |
|             | E1      | Grain yield | -0.39  | 0.52**   | -0.05   | -0.41  |
|             | E2      |             | 0.34   | 0.06     | -0.09   | 0.18   |
|             | E3      |             | 0.47   | -0.13    | -0.35   | 0.11   |
|             | E4      |             | -0.34  | -0.20    | 0.18    | 0.56** |
|             | E5      |             | -0.25  | -0.27    | -0.15   | 0.51** |
| Lentil      | E1      | Grain yield | -      | -        | -       | -      |
|             | E2      |             | 0.18   | 0.23     | 0.12    | -0.14  |
|             | E3      |             | 0.25   | -0.61**  | -0.55** | 0.58** |
|             | E4      |             | 0.11   | 0.07     | 0.17    | 0.34   |
|             | E5      |             | -0.03  | -0.08    | 0.07    | 0.67** |

\* and \*\* indicate significant correlation at 0.05 and 0.01, respectively. PLH; plant height, DTH; days to heading for durum wheat and barley, D50F; days to 50% of flowering for lentil, DTM; days to maturity and TSW; 1000-seed weight.

**Table S11.** Average values (BLUES) for food transformation characteristics of the CWR-derived elites and checks of durum wheat, barley and lentil across environments in Morocco.

| Genotype           | GPC (%) | Zn (mg kg <sup>-1</sup> ) | Fe (mg kg <sup>-1</sup> ) | TSW (g) | GL (mm) | GW (mm) | YI (b*) | MIXO | β-glucan (%) |
|--------------------|---------|---------------------------|---------------------------|---------|---------|---------|---------|------|--------------|
| <b>Durum wheat</b> |         |                           |                           |         |         |         |         |      |              |
| 800018532          | 13.97   | 35.84                     | 23.09                     | 45.36   | 7.3     | 3.41    | 17.99   | 5.06 |              |
| 800034117          | 13.85   | 28.89                     | 22.32                     | 44.87   | 7.32    | 3.29    | 17.33   | 4.83 |              |
| 800034692          | 13.65   | 28.66                     | 27.4                      | 40.37   | 6.93    | 3.20    | 17.67   | 5.34 |              |
| 600100438          | 12.73   | 27.51                     | 25.06                     | 37.99   | 7.06    | 3.12    | 17.92   | 3.31 |              |
| 800018534          | 12.75   | 31.48                     | 28.48                     | 42.46   | 7.21    | 3.19    | 17.63   | 5.99 |              |
| 600108182          | 13.18   | 28.00                     | 30.90                     | 40.49   | 7.08    | 3.16    | 17.73   | 3.89 |              |
| 800031875          | 13.27   | 29.87                     | 21.26                     | 40.79   | 7.15    | 3.18    | 17.55   | 5.21 |              |
| 800031458          | 12.83   | 31.33                     | 24.96                     | 44.67   | 7.30    | 3.33    | 17.40   | 4.37 |              |
| 800018565          | 13.11   | 34.81                     | 20.63                     | 42.87   | 7.11    | 3.23    | 17.41   | 2.36 |              |
| 800034676          | 12.95   | 35.00                     | 23.92                     | 37.60   | 6.76    | 3.17    | 17.51   | 5.99 |              |

|            |       |       |       |       |      |      |       |      |
|------------|-------|-------|-------|-------|------|------|-------|------|
| 800031879  | 13.95 | 30.92 | 18.14 | 43.71 | 7.24 | 3.26 | 17.56 | 5.28 |
| 800031880  | 13.66 | 32.73 | 22.34 | 40.83 | 7.23 | 3.19 | 16.89 | 3.38 |
| 800031881  | 13.21 | 32.02 | 24.14 | 43.95 | 7.10 | 3.30 | 16.94 | 6.09 |
| 800018569  | 13.83 | 29.84 | 18.55 | 45.02 | 7.37 | 3.30 | 17.54 | 5.05 |
| 800032178  | 13.89 | 32.75 | 24.12 | 44.82 | 7.25 | 3.33 | 18.38 | 5.59 |
| 800018541  | 13.51 | 30.08 | 26.46 | 44.97 | 7.45 | 3.34 | 17.77 | 5.73 |
| 273403     | 12.70 | 32.63 | 26.02 | 39.95 | 6.96 | 3.21 | 17.56 | 7.31 |
| 800043267  | 13.97 | 30.89 | 30.44 | 45.76 | 7.33 | 3.34 | 17.81 | 5.11 |
| 800028288  | 12.74 | 31.86 | 19.58 | 38.78 | 7.20 | 3.16 | 17.35 | 3.77 |
| Bonidur    | 13.27 | 33.48 | 21.11 | 41.43 | 7.33 | 3.13 | 17.44 | 4.10 |
| Chicca     | 13.53 | 32.49 | 23.58 | 42.45 | 7.11 | 3.28 | 16.54 | 3.31 |
| Karim      | 12.96 | 26.08 | 24.70 | 39.38 | 7.15 | 3.14 | 17.05 | 4.87 |
| Kundermiki | 13.12 | 27.93 | 18.82 | 37.16 | 6.98 | 3.06 | 16.80 | 4.70 |
| Zagharin2  | 13.93 | 31.48 | 21.73 | 44.51 | 7.23 | 3.30 | 18.42 | 5.34 |
| <hr/>      |       |       |       |       |      |      |       |      |
| Barley     |       |       |       |       |      |      |       |      |
| 5925       | 12.69 | 32.62 | 34.00 | 47.94 | 8.32 | 3.41 |       | 5.81 |
| 5864       | 13.02 | 35.20 | 31.87 | 41.36 | 8.35 | 3.19 |       | 5.51 |
| 5849       | 12.67 | 34.06 | 33.35 | 42.26 | 8.26 | 3.20 |       | 5.4  |
| 5904       | 13.11 | 33.91 | 30.70 | 48.65 | 8.54 | 3.35 |       | 5.38 |
| 5895       | 11.83 | 32.46 | 36.82 | 48.94 | 8.63 | 3.32 |       | 5.33 |
| 28898      | 12.60 | 37.38 | 41.33 | 46.48 | 8.21 | 3.35 |       | 5.23 |
| 5900       | 13.33 | 35.35 | 26.54 | 49.06 | 8.42 | 3.39 |       | 5.21 |
| 28899      | 13.15 | 32.83 | 32.31 | 49.67 | 8.12 | 3.39 |       | 5.19 |
| 28896      | 12.32 | 32.46 | 34.74 | 46.81 | 8.18 | 3.35 |       | 4.95 |
| 5883       | 13.96 | 34.66 | 32.37 | 46.75 | 7.87 | 3.38 |       | 4.9  |
| 5935       | 13.01 | 34.49 | 36.83 | 46.72 | 8.04 | 3.36 |       | 4.88 |
| 5873       | 12.41 | 33.71 | 32.55 | 48.93 | 8.88 | 3.36 |       | 4.86 |
| 28897      | 12.97 | 31.31 | 32.21 | 46.37 | 7.93 | 3.33 |       | 4.82 |
| 5929       | 12.76 | 33.48 | 26.06 | 51.97 | 8.80 | 3.40 |       | 4.57 |
| 5922       | 13.72 | 33.90 | 35.76 | 45.70 | 7.91 | 3.36 |       | 4.48 |
| 5865       | 12.88 | 34.93 | 39.88 | 42.92 | 8.25 | 3.23 |       | 4.47 |
| 5918       | 12.96 | 32.22 | 28.02 | 49.18 | 8.28 | 3.41 |       | 4.47 |
| 5920       | 13.67 | 32.87 | 32.67 | 42.22 | 6.92 | 2.75 |       | 4.41 |
| 5846       | 12.54 | 33.58 | 37.72 | 49.26 | 8.74 | 3.37 |       | 4.39 |
| 5890       | 12.96 | 32.77 | 29.22 | 40.52 | 6.22 | 2.64 |       | 4.37 |
| 5934       | 12.91 | 33.20 | 31.20 | 44.84 | 7.53 | 2.89 |       | 4.36 |
| 28895      | 12.81 | 35.10 | 39.84 | 45.39 | 8.02 | 3.32 |       | 4.18 |
| 5905       | 12.95 | 36.24 | 27.78 | 47.93 | 8.21 | 3.41 |       | 4.08 |
| 5939       | 13.00 | 31.06 | 36.56 | 45.63 | 8.21 | 3.36 |       | 4    |
| Rihane03   | 11.98 | 32.39 | 41.52 | 42.59 | 8.38 | 3.20 |       | 5.07 |
| WI2291     | 12.19 | 31.23 | 35.53 | 47.23 | 8.16 | 3.37 |       | 4.66 |
| Furat-3    | 12.45 | 30.58 | 33.24 | 48.76 | 8.88 | 3.34 |       | 4.29 |
| Tamellalt  | 12.53 | 34.89 | 30.92 | 43.19 | 7.67 | 3.35 |       | 4.07 |
| <hr/>      |       |       |       |       |      |      |       |      |
| Lentil     |       |       |       |       |      |      |       |      |
| 4916       | 23.68 | 45.71 | 55.06 | 49.32 | 5.97 | 5.45 |       |      |
| 53         | 22.53 | 51.49 | 42.45 | 41.13 | 5.25 | 4.85 |       |      |

|        |       |       |       |       |      |      |
|--------|-------|-------|-------|-------|------|------|
| 56     | 23.37 | 50.39 | 71.86 | 37.13 | 5.15 | 4.71 |
| 67     | 22.81 | 45.37 | 50.03 | 24.38 | 4.41 | 3.97 |
| 4633   | 22.78 | 48.14 | 50.54 | 42.60 | 5.36 | 4.90 |
| 4638   | 22.91 | 57.83 | 36.84 | 40.13 | 5.23 | 4.90 |
| 4652   | 23.45 | 54.91 | 78.24 | 38.13 | 5.12 | 4.73 |
| 4653   | 23.95 | 41.68 | 52.77 | 38.63 | 5.31 | 4.82 |
| 4732   | 23.24 | 42.13 | 54.23 | 36.18 | 4.99 | 4.51 |
| 4733   | 23.79 | 39.88 | 55.05 | 37.31 | 5.12 | 4.61 |
| 4741   | 23.31 | 48.95 | 42.64 | 27.88 | 4.59 | 4.13 |
| 4934   | 23.48 | 48.41 | 57.98 | 49.16 | 5.81 | 5.31 |
| 4675   | 23.62 | 46.35 | 36.68 | 38.92 | 5.25 | 4.76 |
| 4688   | 23.21 | 43.67 | 47.63 | 27.38 | 4.46 | 4.10 |
| 4704   | 23.60 | 37.08 | 44.39 | 27.38 | 4.53 | 4.16 |
| 4717   | 22.70 | 48.83 | 38.94 | 32.38 | 4.84 | 4.45 |
| 4757   | 23.84 | 59.43 | 51.45 | 35.77 | 5.05 | 4.53 |
| 4935   | 23.42 | 48.95 | 54.55 | 47.90 | 5.75 | 5.25 |
| 4936   | 23.52 | 54.07 | 53.48 | 47.41 | 5.77 | 5.28 |
| 4937   | 23.46 | 47.38 | 51.63 | 48.49 | 5.77 | 5.29 |
| 4938   | 23.49 | 44.80 | 65.21 | 45.14 | 5.62 | 5.15 |
| 4944   | 22.87 | 44.79 | 41.00 | 41.13 | 5.52 | 5.01 |
| 20     | 24.27 | 35.16 | 37.75 | 52.13 | 6.06 | 5.52 |
| 41     | 22.91 | 61.24 | 50.00 | 41.78 | 5.32 | 4.85 |
| Bakria | 23.48 | 52.10 | 52.11 | 46.41 | 5.71 | 5.22 |

---

GPC; grain protein content, Zn; zinc content, Fe; iron content, TSW; 1000-seed weight, GL; grain length, GW; grain width, YI; yellow pigment index and MIXO; mixo-score.
